# Supplementary material
Source: publisher figshare collection journal article supplement (https://tandf.figshare.com/ndownloader/files/15165929)
Supplement: Supplementary file 1 [file 15165929]

Table S1: Surface area, pore volume and pore size of CoAl and Bent-CoAl

|  | CoAl | B-CoAl |
| --- | --- | --- |
| BET surface area (m2/g) | 44.2 | 119.1 |
| Pore volume (at p/po=0.3014) (cm3/g) | 0.02 | 0.06 |
| Pore size (based on BJH) (A) | 34.6 | 19.5 |

|  | 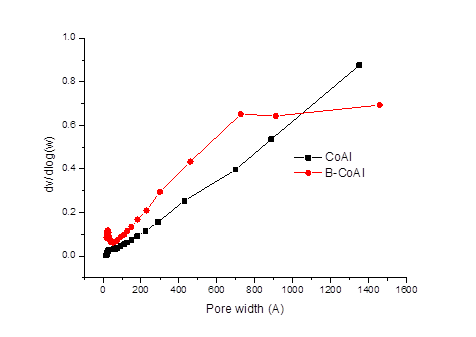 |
| --- | --- |

Fig S1: (Pore size distribution for CoAl and Bent-CoAl


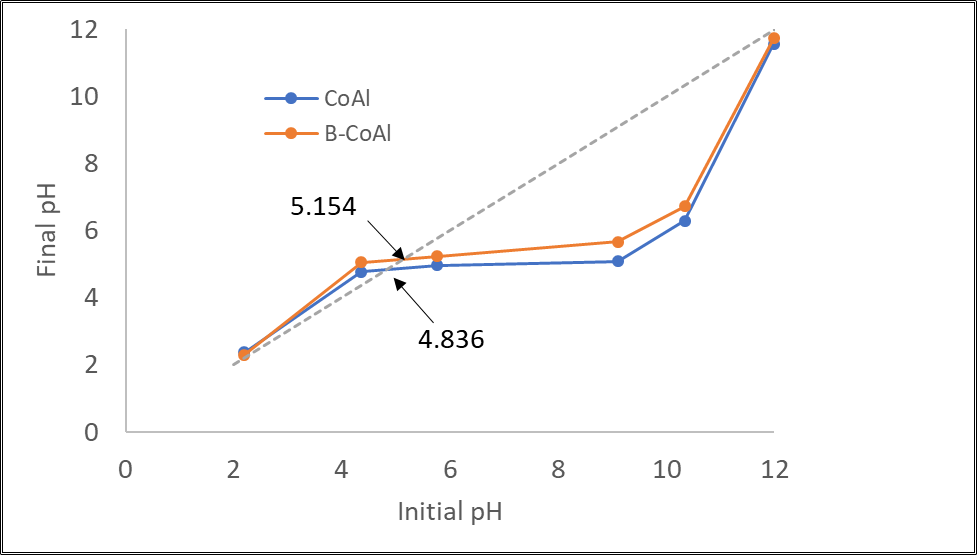


Fig S2: point of zero charge for CoAl and Bent-CoAl





Figure S3. Linear plot between LnKd and 1/T for CoAl and Bent-CoAl
